# Supplementary material for: Beneficial Effects of Table Grape Use on Serum Levels of Omega-3 Index and Liver Function: A Randomized Controlled Clinical Trial
Source: MDPI journal article supplement (doi:10.3390/biomedicines10092310), 2022-09-16
Supplement: s1 [file s1]

**Table S1: Adherence questionnaire**

| <b>Answers</b>                                            | <b>Always</b><br><i>Score: 1</i> | <b>Often</b><br><i>Score: 2</i> | <b>Sometimes</b><br><i>Score: 3</i> | <b>Rarely</b><br><i>Score: 4</i> | <b>Never</b><br><i>Score: 5</i> |
|-----------------------------------------------------------|----------------------------------|---------------------------------|-------------------------------------|----------------------------------|---------------------------------|
| I replaced the grapes received with other varieties       |                                  |                                 |                                     |                                  |                                 |
| I forgot to eat the received portion of grapes            |                                  |                                 |                                     |                                  |                                 |
| I stopped eating the received grapes for a period of time |                                  |                                 |                                     |                                  |                                 |

The maximum possible score is 15 points. Adherence to the study design is confirmed by a score  $\geq 12$  ( $\geq 80\%$ ).
